# Supplementary material for: Una teoria sintáctica per a l'escola
Source: MDPI journal article supplement (doi:10.3390/ph16020324), 1977-01-01

**Table S1.** Gene expression analysis among different groups

| <b>2<sup>-ΔCt</sup> values</b> |                |                  |              |                 |                        |         |
|--------------------------------|----------------|------------------|--------------|-----------------|------------------------|---------|
| <b>Gene</b>                    | <b>Control</b> | <b>Drug Free</b> | <b>5-ASA</b> | <b>Anti-TNF</b> | <b>p value</b>         |         |
| <b>ABCB1</b>                   | 3.86 ± 0.96    | 0.73 ± 0.12      | 1.37 ± 0.51  | 4.50 ± 0.60     | Control vs. Drug Free  | <0.0001 |
|                                |                |                  |              |                 | Control vs. 5-ASA      | <0.0001 |
|                                |                |                  |              |                 | Control vs. Anti-TNF   | 0.4361  |
|                                |                |                  |              |                 | Drug Free vs. 5-ASA    | 0.1312  |
|                                |                |                  |              |                 | Drug Free vs. Anti-TNF | <0.0001 |
|                                |                |                  |              |                 | 5-ASA vs. Anti-TNF     | <0.0001 |
| <b>LCN2</b>                    | 0.77 ± 0.11    | 4.37 ± 1.26      | 2.23 ± 0.74  | 0.90 ± 0.11     | Control vs. Drug Free  | <0.0001 |
|                                |                |                  |              |                 | Control vs. 5-ASA      | <0.0001 |
|                                |                |                  |              |                 | Control vs. Anti-TNF   | 0.0139  |
|                                |                |                  |              |                 | Drug Free vs. 5-ASA    | 0.4428  |
|                                |                |                  |              |                 | Drug Free vs. Anti-TNF | <0.0001 |
|                                |                |                  |              |                 | 5-ASA vs. Anti-TNF     | 0.0012  |
| <b>NOS2</b>                    | 0.77 ± 0.10    | 3.83 ± 1.38      | 1.17 ± 0.75  | 2.18 ± 0.59     | Control vs. Drug Free  | <0.0001 |
|                                |                |                  |              |                 | Control vs. 5-ASA      | <0.0001 |
|                                |                |                  |              |                 | Control vs. Anti-TNF   | <0.0001 |
|                                |                |                  |              |                 | Drug Free vs. 5-ASA    | 0.0004  |
|                                |                |                  |              |                 | Drug Free vs. Anti-TNF | >0.9999 |
|                                |                |                  |              |                 | 5-ASA vs. Anti-TNF     | 0.0095  |
| <b>TFF1</b>                    | 0.76 ± 0.13    | 4.37 ± 1.01      | 2.28 ± 0.73  | 0.90 ± 0.10     | Control vs. Drug Free  | <0.0001 |
|                                |                |                  |              |                 | Control vs. 5-ASA      | <0.0001 |
|                                |                |                  |              |                 | Control vs. Anti-TNF   | 0.0188  |
|                                |                |                  |              |                 | Drug Free vs. 5-ASA    | 0.2639  |
|                                |                |                  |              |                 | Drug Free vs. Anti-TNF | <0.0001 |
|                                |                |                  |              |                 | 5-ASA vs. Anti-TNF     | 0.0016  |
| <b>MUC2</b>                    | 0.77 ± 0.10    | 4.00 ± 0.75      | 2.42 ± 0.84  | 0.90 ± 0.27     | Control vs. Drug Free  | <0.0001 |
|                                |                |                  |              |                 | Control vs. 5-ASA      | <0.0001 |
|                                |                |                  |              |                 | Control vs. Anti-TNF   | 0.2564  |
|                                |                |                  |              |                 | Drug Free vs. 5-ASA    | 0.1811  |
|                                |                |                  |              |                 | Drug Free vs. Anti-TNF | <0.0001 |
|                                |                |                  |              |                 | 5-ASA vs. Anti-TNF     | 0.0003  |
| <b>MUC5AC</b>                  | 0.75 ± 0.13    | 4.37 ± 0.90      | 2.24 ± 0.77  | 0.86 ± 0.28     | Control vs. Drug Free  | <0.0001 |
|                                |                |                  |              |                 | Control vs. 5-ASA      | <0.0001 |
|                                |                |                  |              |                 | Control vs. Anti-TNF   | >0.9999 |
|                                |                |                  |              |                 | Drug Free vs. 5-ASA    | 0.1717  |
|                                |                |                  |              |                 | Drug Free vs. Anti-TNF | <0.0001 |
|                                |                |                  |              |                 | 5-ASA vs. Anti-TNF     | <0.0001 |
| <b>E-cadherin</b>              | 4.19 ± 0.64    | 1.05 ± 0.54      | 1.83 ± 0.62  | 4.27 ± 0.46     | Control vs. Drug Free  | <0.0001 |
|                                |                |                  |              |                 | Control vs. 5-ASA      | <0.0001 |
|                                |                |                  |              |                 | Control vs. Anti-TNF   | >0.9999 |
|                                |                |                  |              |                 | Drug Free vs. 5-ASA    | 0.4972  |
|                                |                |                  |              |                 | Drug Free vs. Anti-TNF | <0.0001 |
|                                |                |                  |              |                 | 5-ASA vs. Anti-TNF     | <0.0001 |

**Table S2.** Explanation of correlation between different genes

| <b>r value =</b>      |                                    |
|-----------------------|------------------------------------|
| <b>+.70 or higher</b> | Very strong positive relationship  |
| <b>+.40 to +.69</b>   | Strong positive relationship       |
| <b>+.30 to +.39</b>   | Moderate positive relationship     |
| <b>+.20 to +.29</b>   | weak positive relationship         |
| <b>+.01 to +.19</b>   | No or negligible relationship      |
| <b>0</b>              | No relationship [zero correlation] |
| <b>-.01 to -.19</b>   | No or negligible relationship      |
| <b>-.20 to -.29</b>   | weak negative relationship         |
| <b>-.30 to -.39</b>   | Moderate negative relationship     |
| <b>-.40 to -.69</b>   | Strong negative relationship       |
| <b>-.70 or higher</b> | Very strong negative relationship  |

**Table S3.** Primer Sequences of different genes

| <b>Gene</b>     | <b>Primer Sequences</b>                               | <b>Reference Sequences</b> | <b>PCR product size (bp)</b> |
|-----------------|-------------------------------------------------------|----------------------------|------------------------------|
| GAPDH           | F: ATGTTGCAACCGGGAAGGAA<br>R: AGGAAAAGCATCACCCGGAG    | NM_001256799.3             | 159bp                        |
| ABCB1 gene      | F:TCAGGAAGCAACCAGATAAAAGAG<br>R:CAATCAGCCTCACCACAGATG | NM_000927.5                | 141bp                        |
| LCN2 gene       | F:GTTACCTCGTCCGAGTGGTG<br>R:CCGAAGTCAGCTCCTTGGTT      | XM_047423376.1             | 126bp                        |
| NOS2 gene       | F:CGCATGACCTTGGTGTTTGG<br>R:CATAGACCTTGGGCTTGCCA      | NM_000625.4                | 142bp                        |
| TFF1 gene       | F:ATACCATCGACGTCCCTCCA<br>R:TGGGACTAATCACCGTGCTG      | NM_003225.3                | 104bp                        |
| MUC2 gene       | F:AGTTTGGGGAGCACTTCGAG<br>R:TCTTCCACGCAGTGGGTAAC      | >NM_002457.4               | 118BP                        |
| MUC5AC gene     | F:CGACCTGTGCTGTGTACCAT<br>R:GTGCAGGGTCACATTCTCA       | NM_001304359.2             | 197BP                        |
| E-cadherin gene | F:TGGACCGAGAGAGTTTCCCT<br>R:TTAGCCTCGTTCTCAGGCAC      | NM_004360.5                | 172BP                        |

**TFF1 vs. MUC5AC**

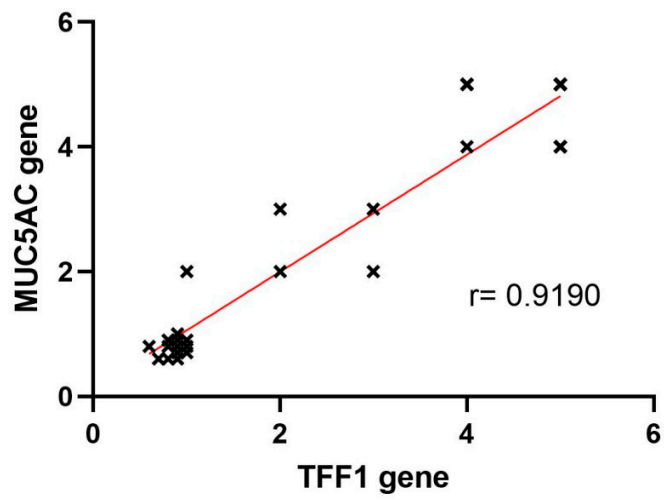

**TFF1 vs. E-cadherin**

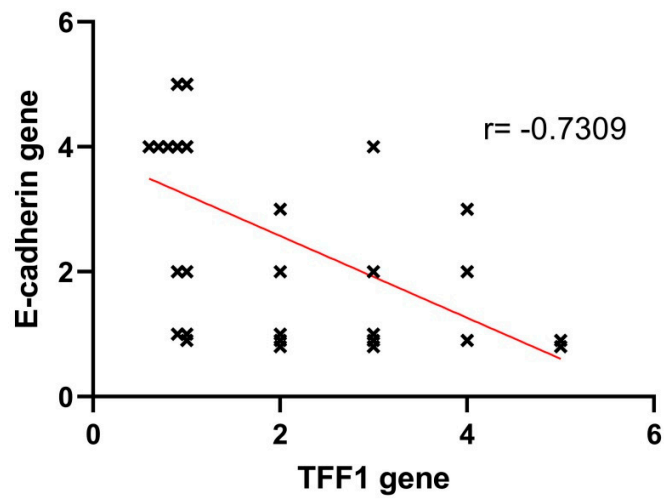

**NOS2 vs. TFF1**

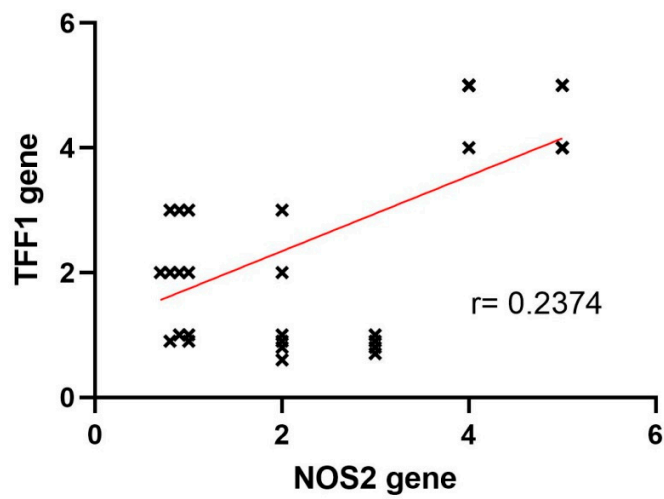

**NOS2 vs. MUC5AC**

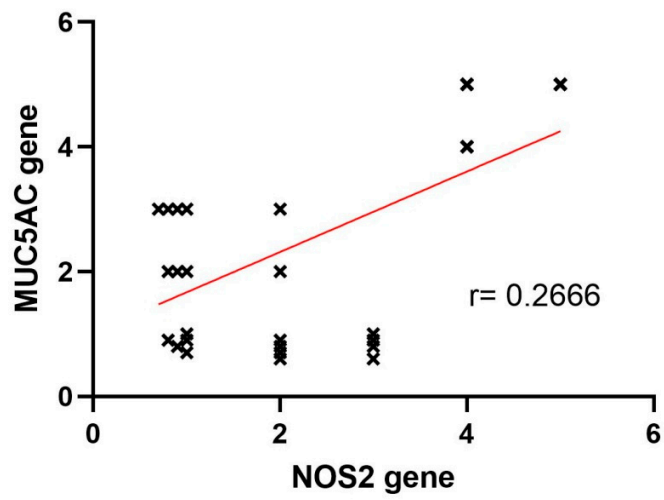

**NOS2 vs. MUC2**

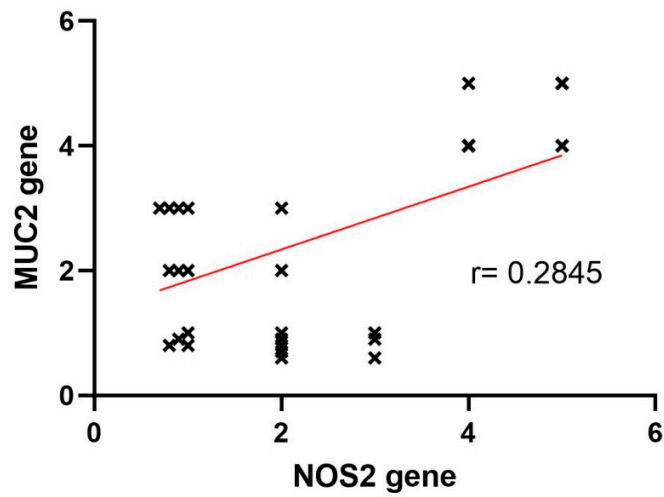

**NOS2 vs. E-cadherin**

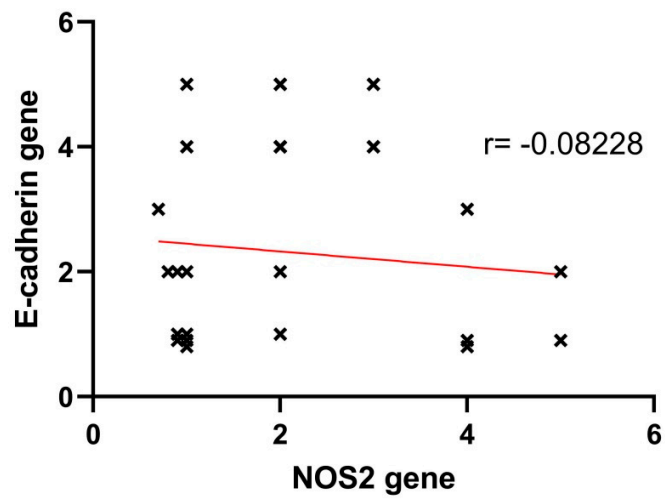

**MUC5AC vs. E-cadherin**

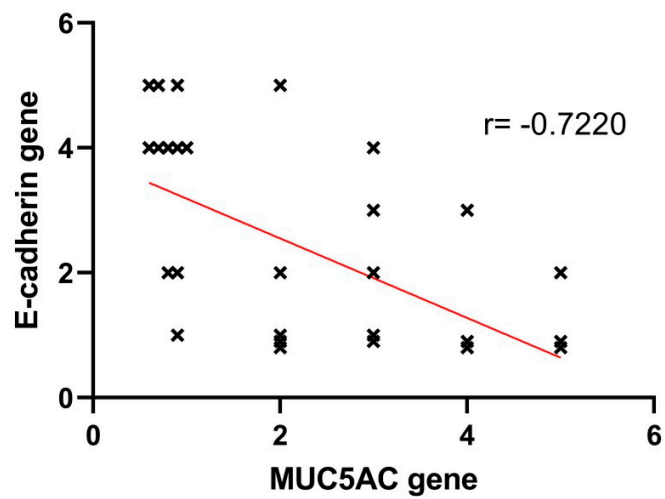

**MUC2 vs. MUC5AC**

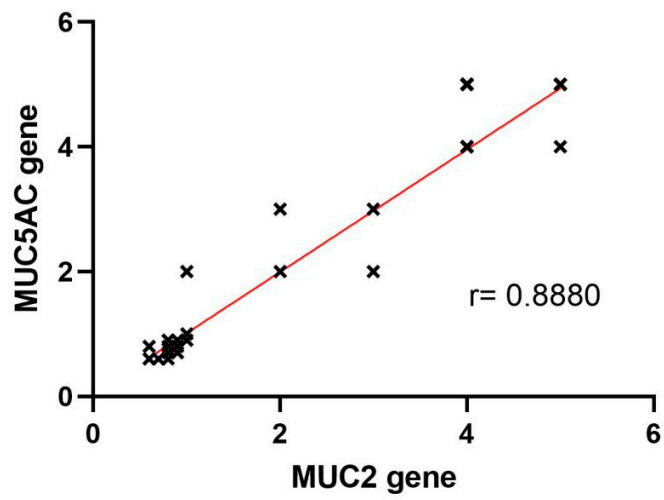

**MUC2 vs. E-cadherin**

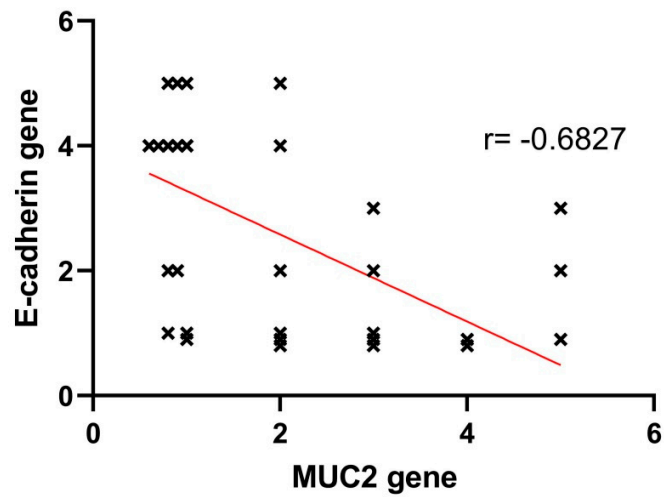

LCN2 vs. TFF1

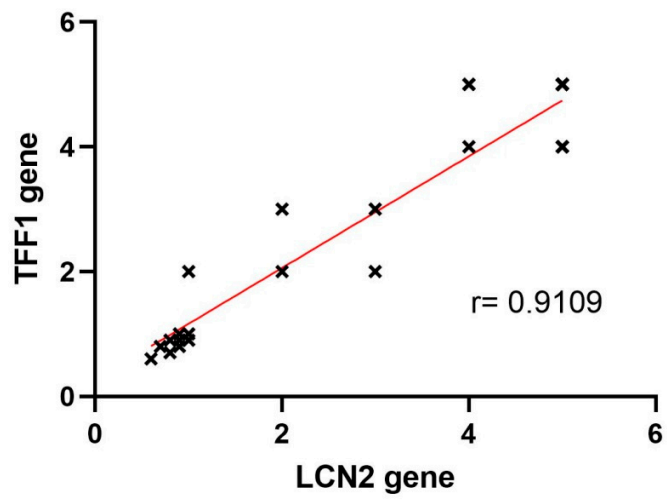

LCN2 vs. NOS2

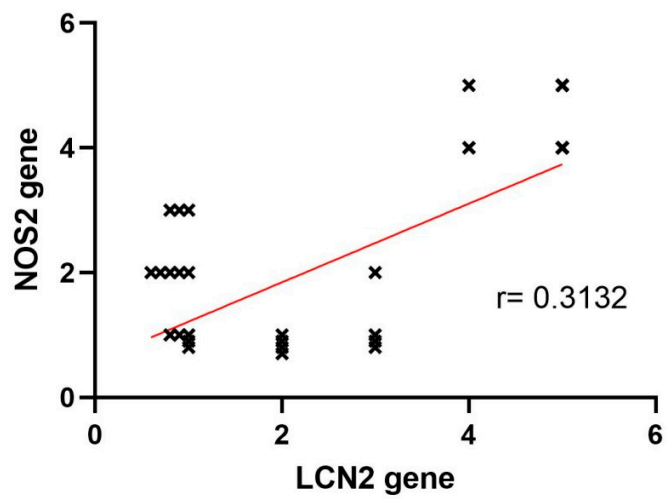

LCN2 vs. MUC5AC

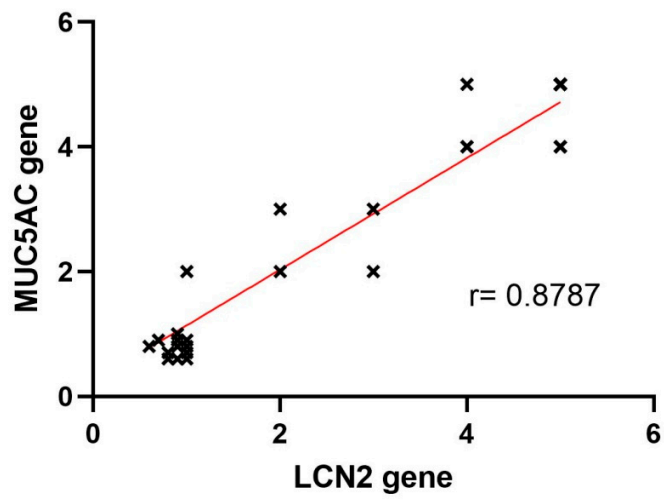

LCN2 vs. MUC2

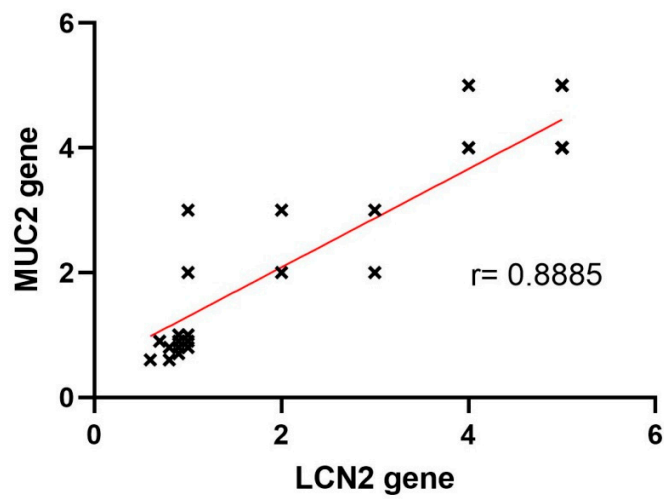

LCN 2 vs. E-cadherin

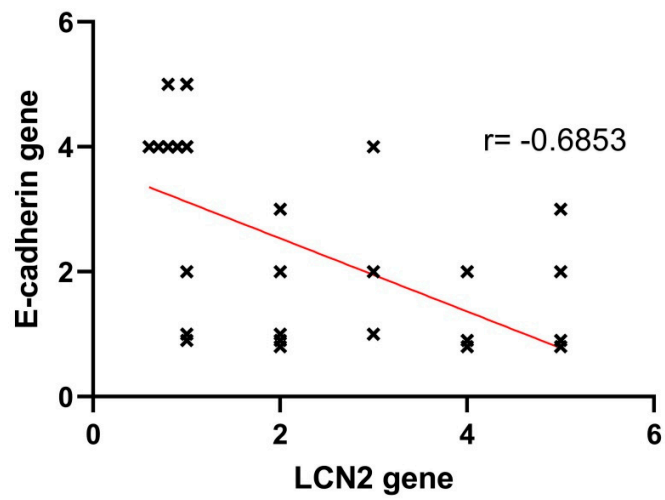

ABCB1 vs. TFF1

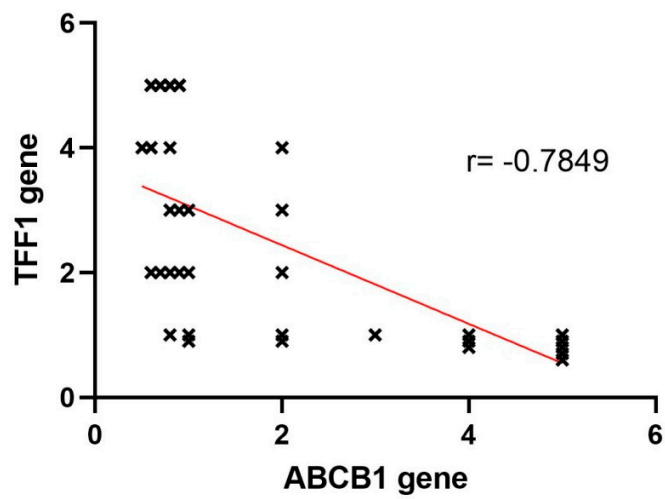



**ABCB1 vs. MUC2**

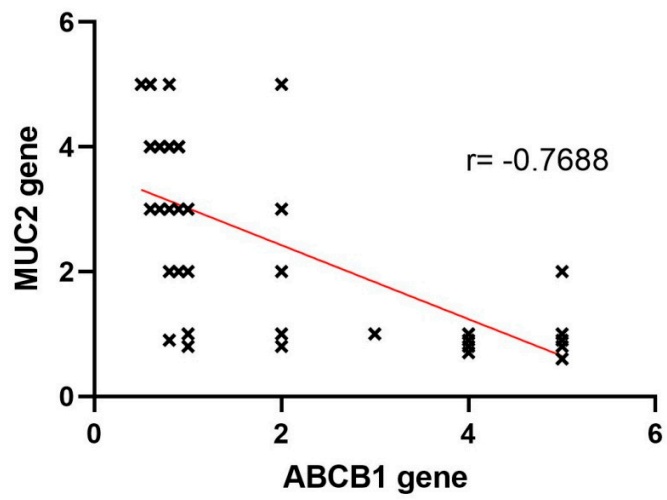

**ABCB1 vs. LCN2**

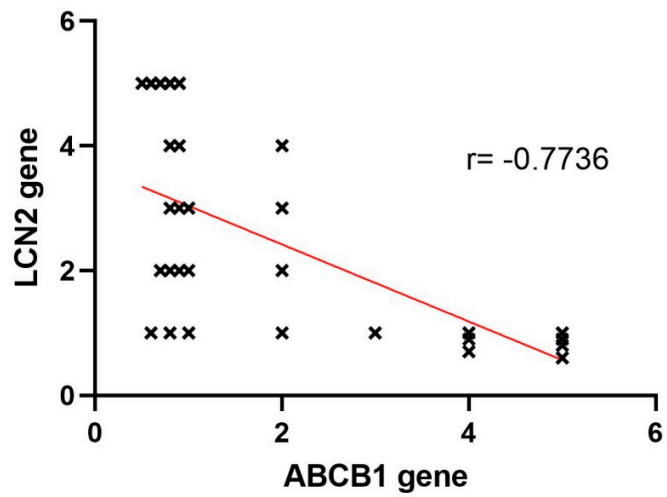

ABCB1 vs. E-cadherin

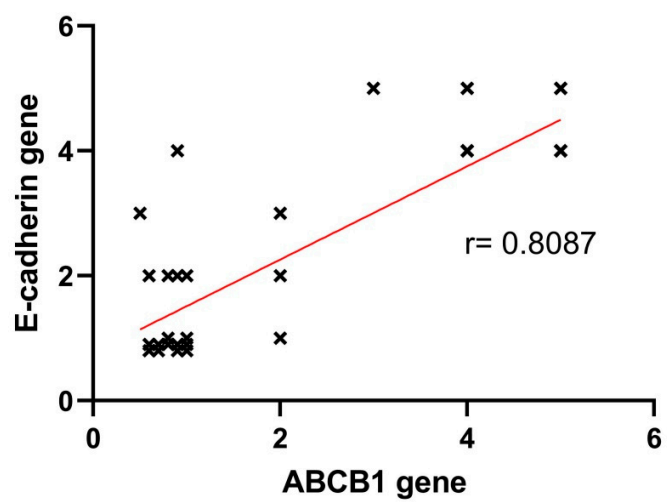

## IBD Patients

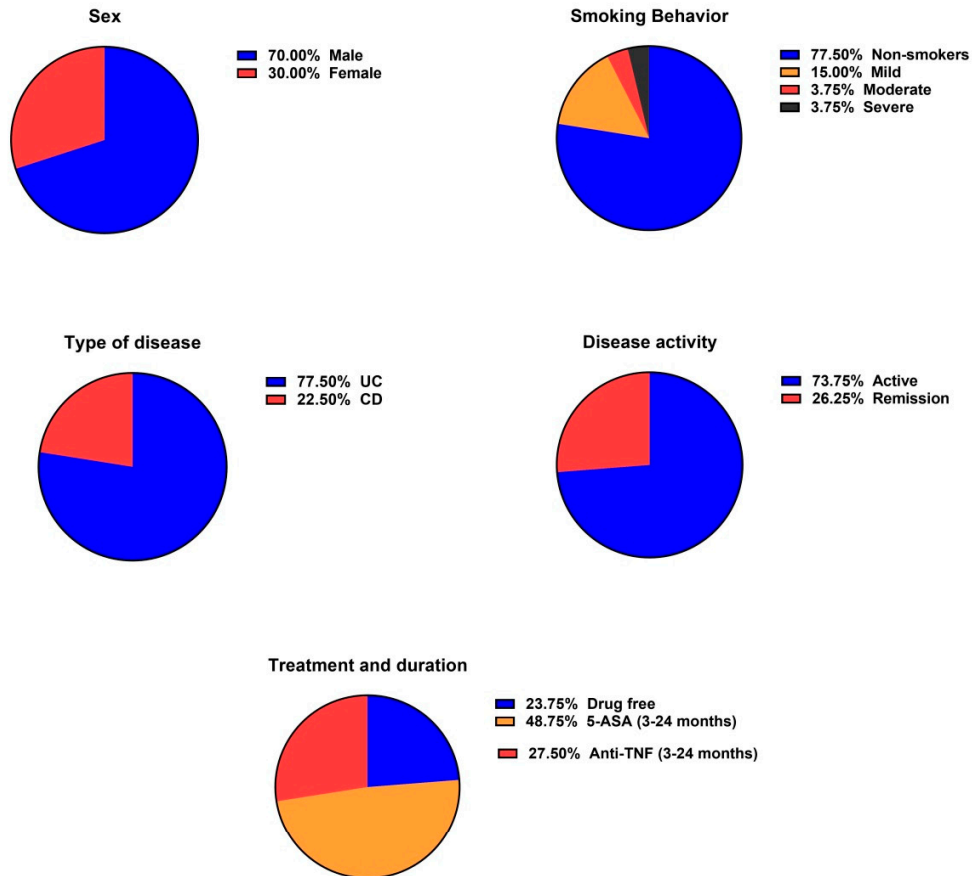

---

## Non-IBD controls

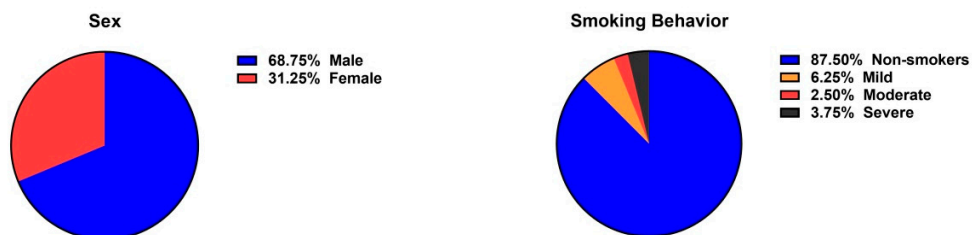

Supplement: s1 [file s1]
